# Supplementary material for: Orientational order of dyes in a lyotropic chromonic liquid crystal
Source: Royal Society of Chemistry journal article supplement (doi:10.1039/d2sm01110g), 2022-01-01
Supplement: d2sm01110g1.pdf [file d2sm01110g1.pdf]

# Orientational Order of Dyes in a Lyotropic Chromonic Liquid Crystal

(Electronic Supplementary Information)

S. Yang,<sup>a</sup> Bingru Zhang,<sup>b</sup> Solomon R. Murdock,<sup>a</sup> and  
Peter J. Collings<sup>\*a,c</sup>

<sup>a</sup> Department of Physics & Astronomy, Swarthmore College,  
Swarthmore, PA, U.S.A.

<sup>b</sup> Department of Physical Chemistry, University of Paderborn,  
Paderborn, Germany

<sup>c</sup> Department of Physics and Astronomy, University of Pennsyl-  
vania, Philadelphia, PA, U.S.A.

\*Corresponding Author: Fax: +1 (610) 328-7895; Tel: +1 (610)  
328-7791; E-mail: pcollin1@swarthmore.edu

## Table of Contents

Fig. S1 : Wavelength dependence of order parameter measurements.

Fig. S2 : Acridine orange HCl spectra with low concentrations of DSCG.

Fig. S3 : Fluorescence spectra of acridine orange HCl with low concentrations of  
DSCG.

Fig. S4 : Decomposition of the acridine orange HCl spectrum.

Fig. S5 : Summary of the decomposition results for acridine orange HCl.

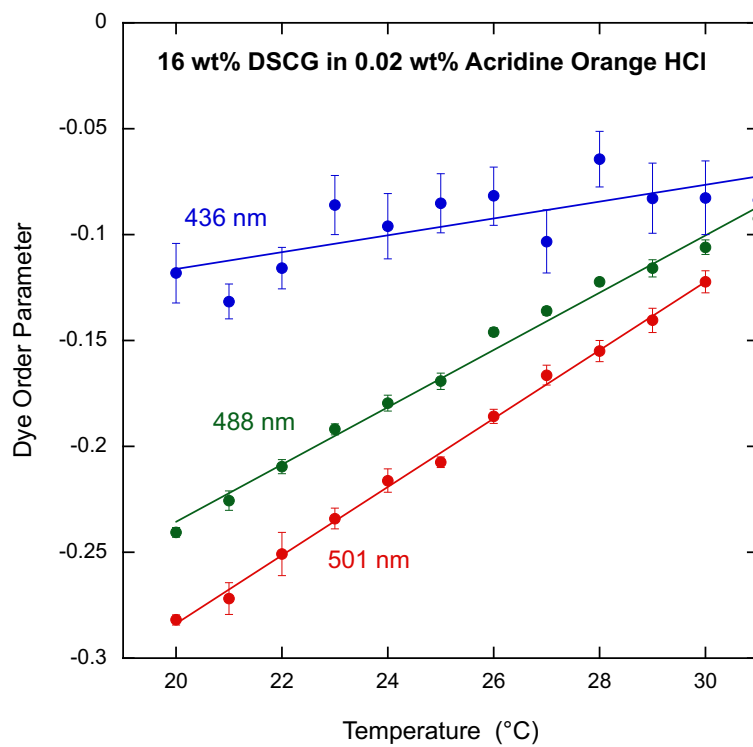

Figure S1: Order parameter of acridine orange HCl relative to the DSCG director as a function of temperature as measured at three wavelengths.

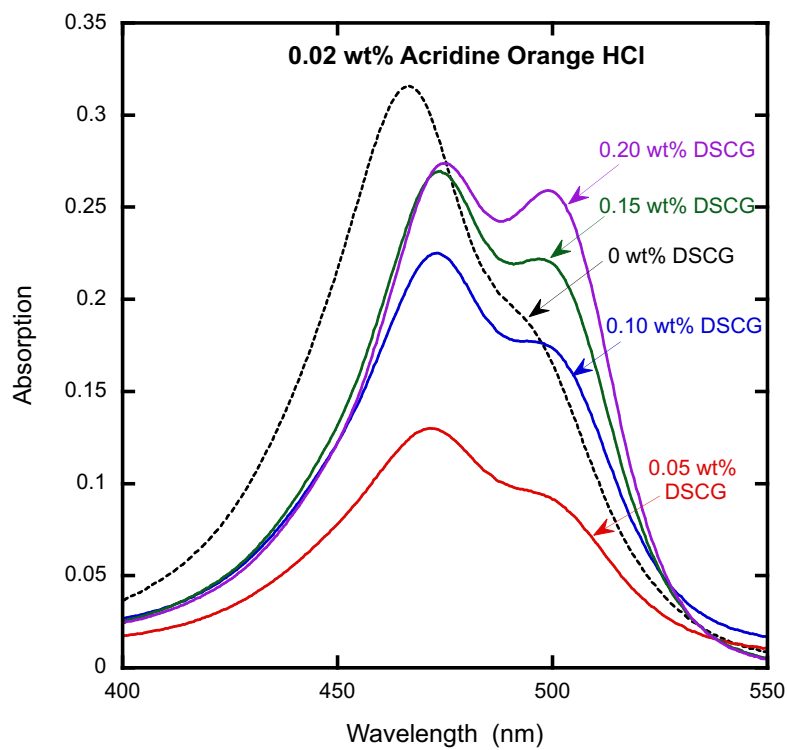

Figure S2: Acridine orange HCl spectra with low concentrations of DSCG. The absorption is decreased for the 0.05 wt% and 0.10 wt% DSCG solutions, (DSCG:AO stoichiometric ratios of 1.5 and 2.9, respectively), but is consistent with higher DSCG concentrations by 0.15 wt%.

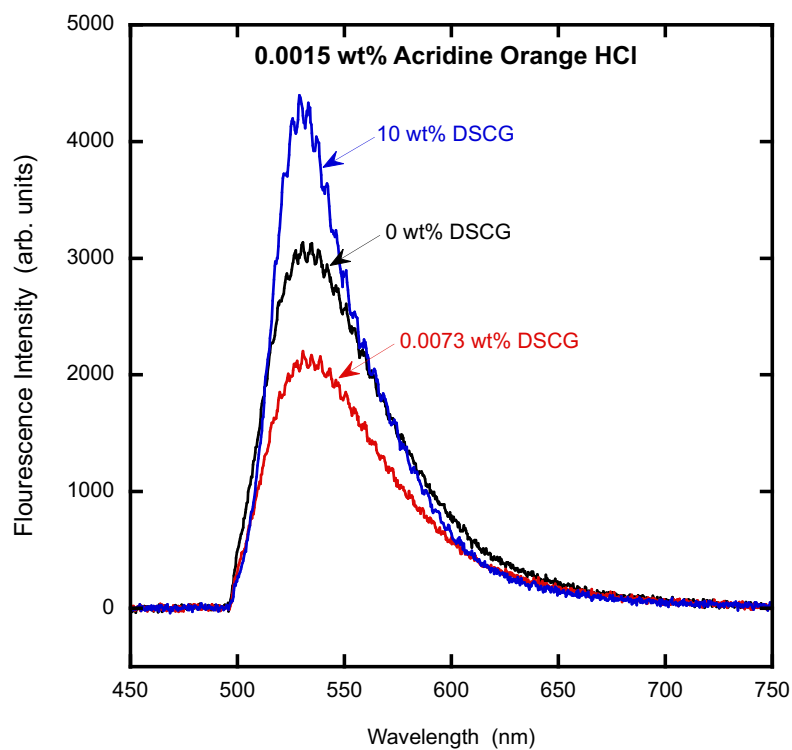

Figure S3: Fluorescence spectra of acridine orange HCl with low concentrations of DSCG. The intensity is decreased for the 0.0073 wt% DSCG solution (DSCG:AO stoichiometric ratio equal to 2.8), but is increased for the 10 wt% DSCG solution. Both DSCG solutions are in the isotropic phase.

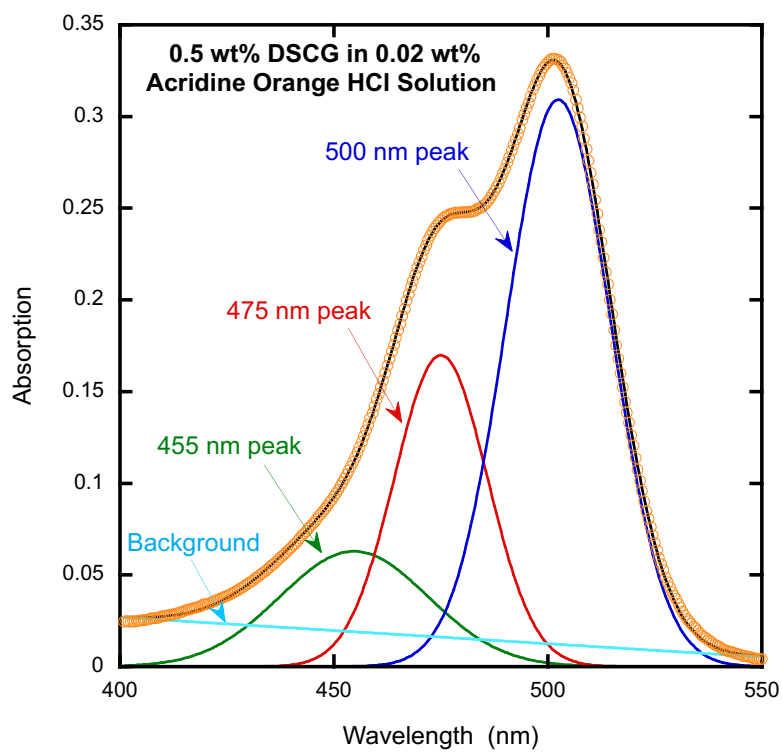

Figure S4: Fit using three peaks to the absorption spectrum of 0.5 wt% DSCG in a 0.02 wt% acridine orange HCl solution. The orange circles are the data and the black line is the fit.

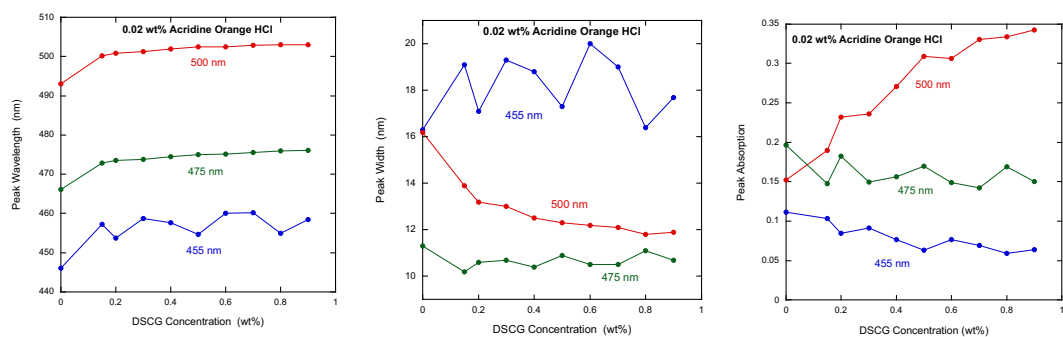

Figure S5: Results of fitting the spectra to three absorption peaks as a function of DSCG concentration in a 0.02 wt% solution of acridine orange HCl. The three absorption peaks are labeled by a typical value of their center wavelength.
