# Supplementary figures and images for: Orientational order of dyes in a lyotropic chromonic liquid crystal
Source: Royal Society of Chemistry journal article supplement (doi:10.1039/d2sm01110g), 2022-01-01

Dye Order Parameter

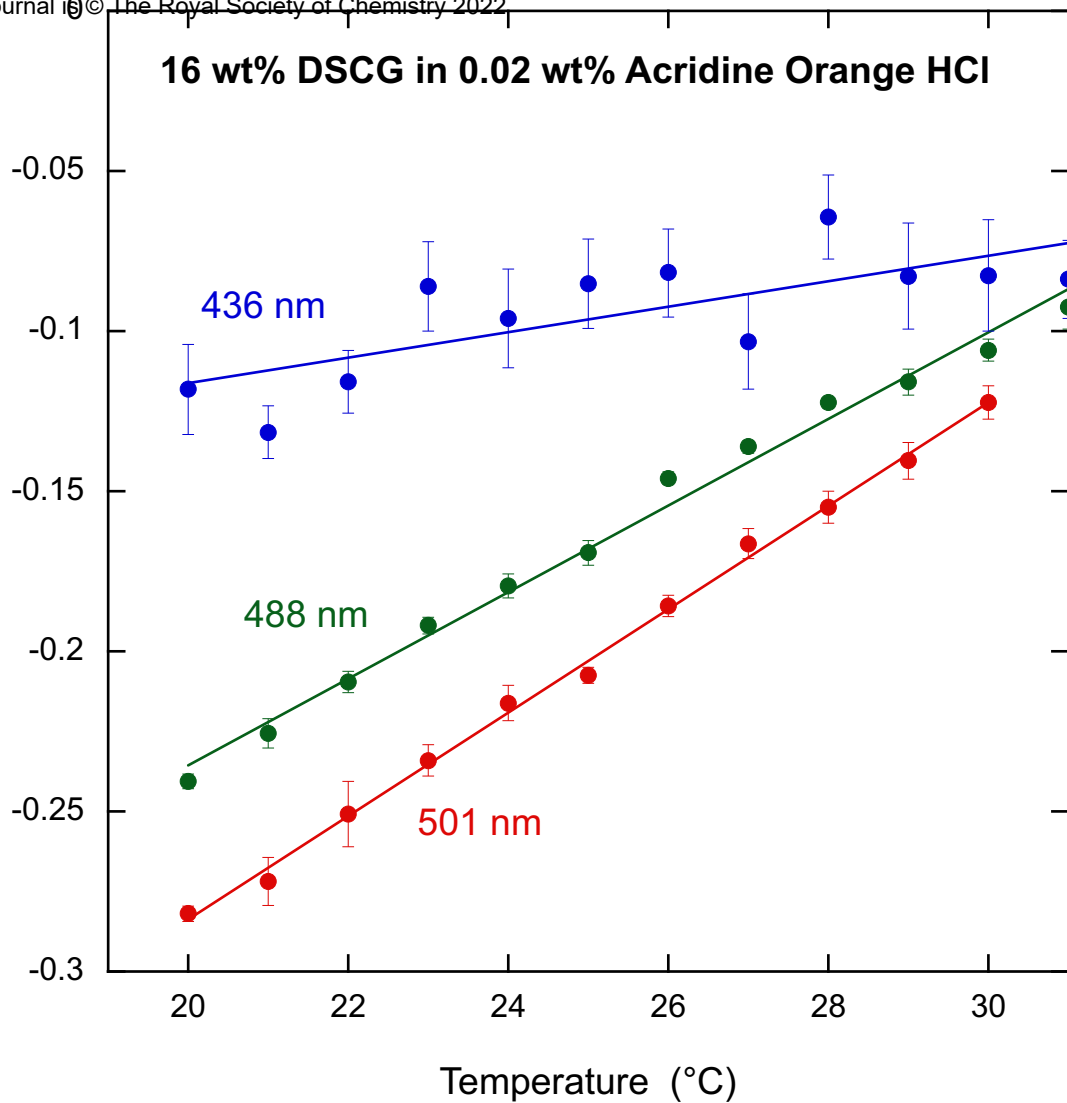

Supplement: d2sm01110g3.pdf [file d2sm01110g3.pdf]

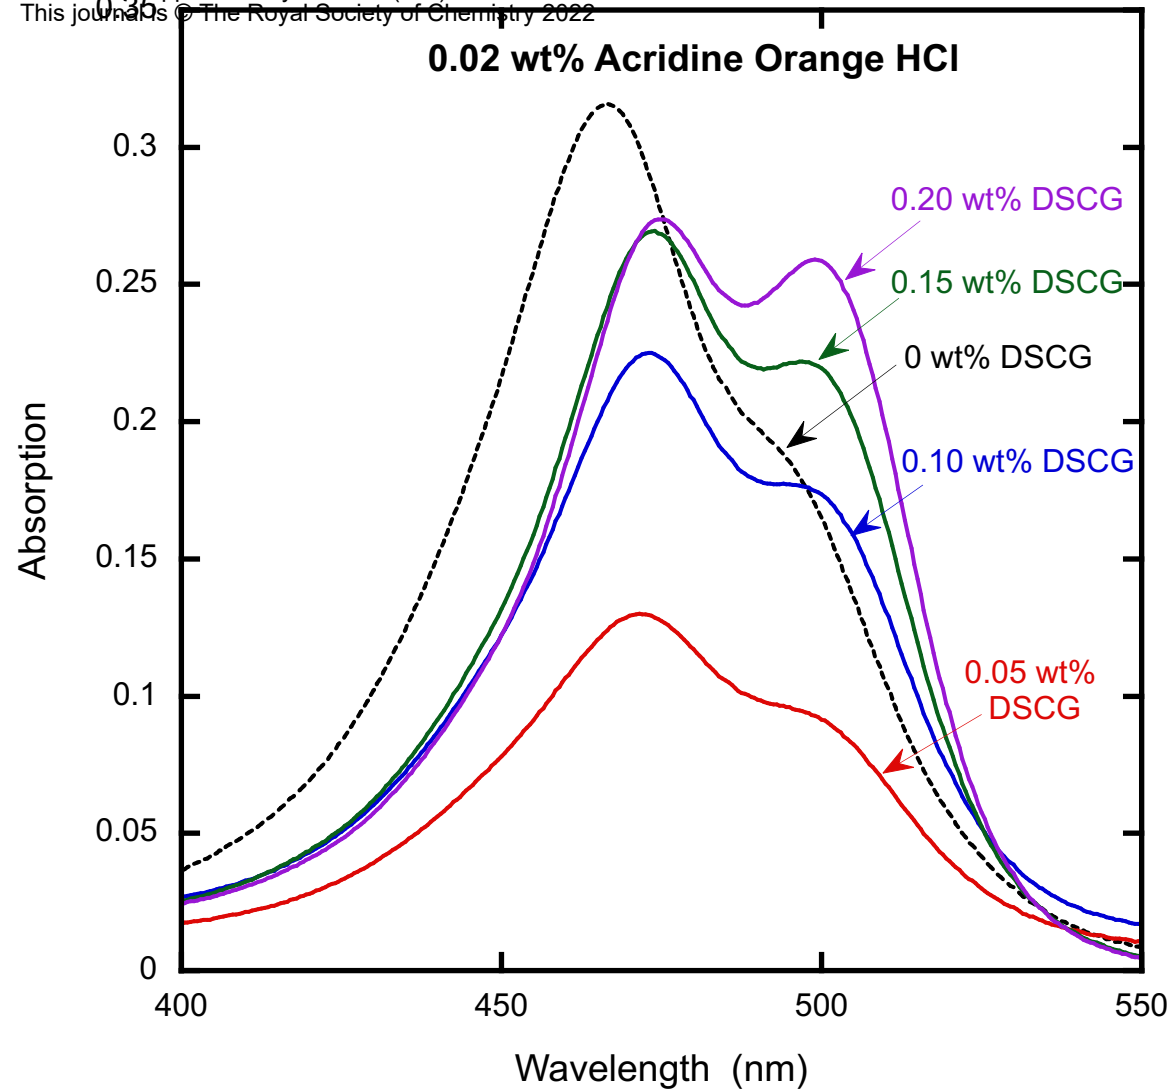

Supplement: d2sm01110g4.pdf [file d2sm01110g4.pdf]

### 0.0015 wt% Acridine Orange HCl

Flourescence Intensity (arb. units)

5000  
4000  
3000  
2000  
1000  
0

450 500 550 600 650 700 750

Wavelength (nm)

10 wt% DSCG

0 wt% DSCG

0.0073 wt% DSCG

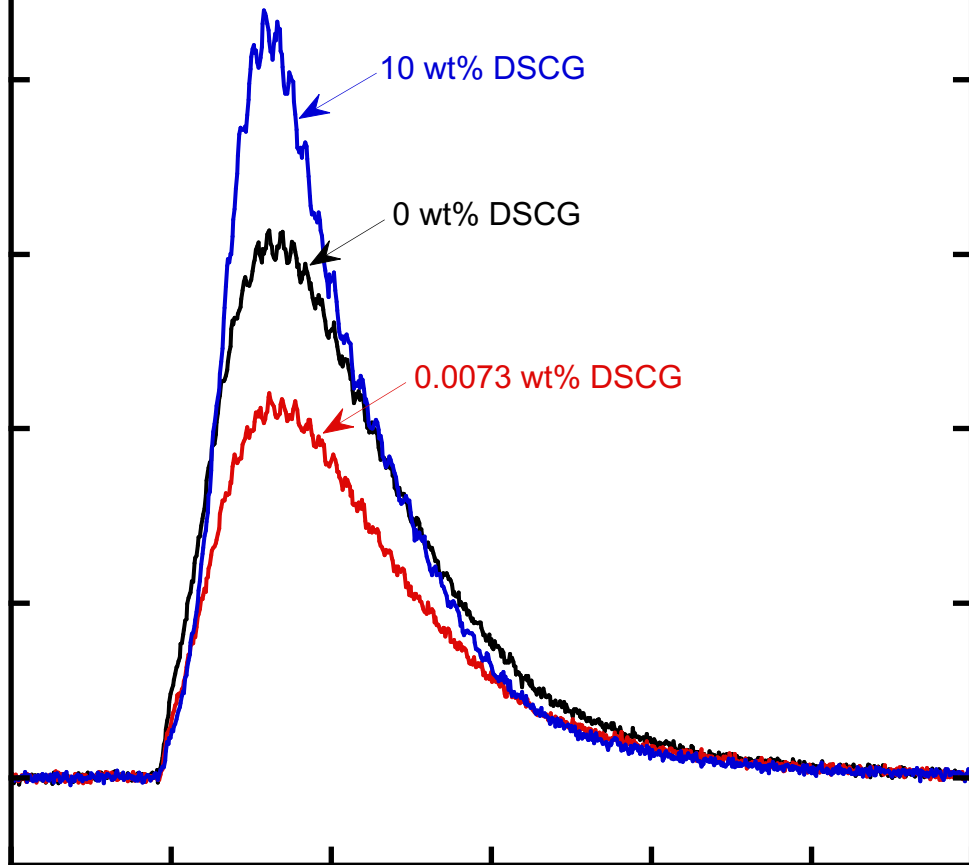

Supplement: d2sm01110g5.pdf [file d2sm01110g5.pdf]

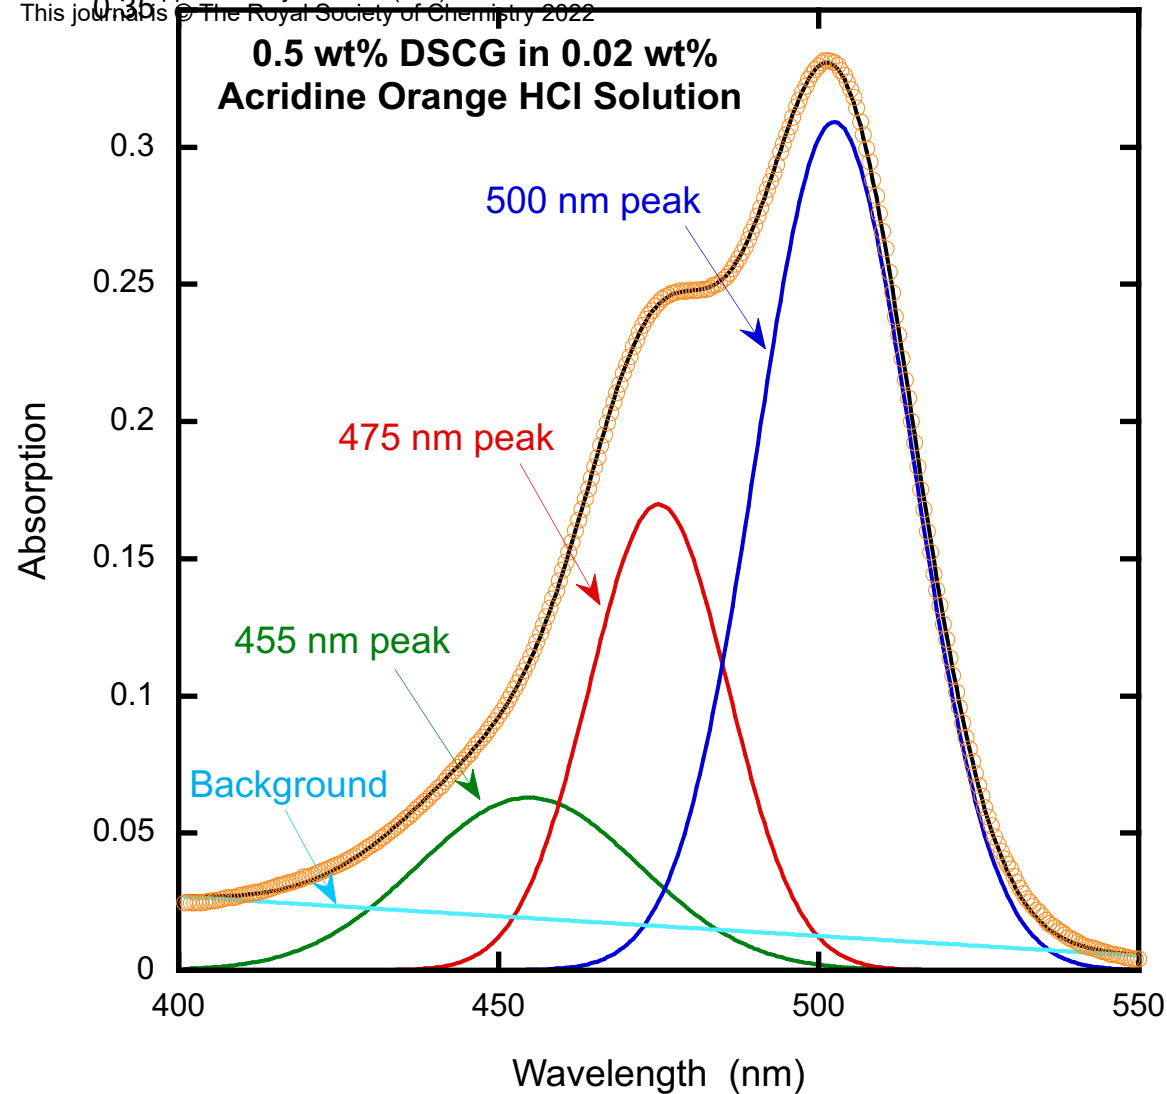

Supplement: d2sm01110g6.pdf [file d2sm01110g6.pdf]

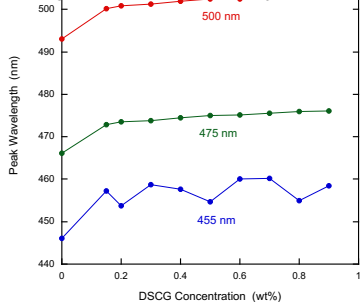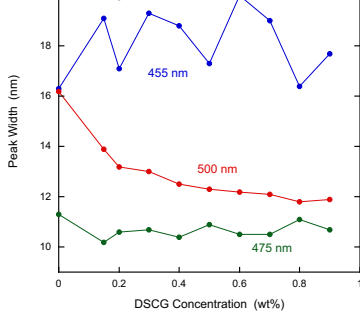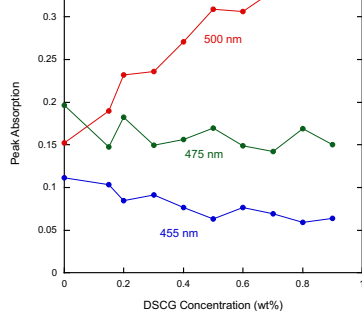

Supplement: d2sm01110g7.pdf [file d2sm01110g7.pdf]
